# Supplementary material
Source: Springer Nature journal article supplement (https://www.springerprofessional.de/resource/supplementary/13638_2013_796_MOESM9_ESM.pdf/11898484)

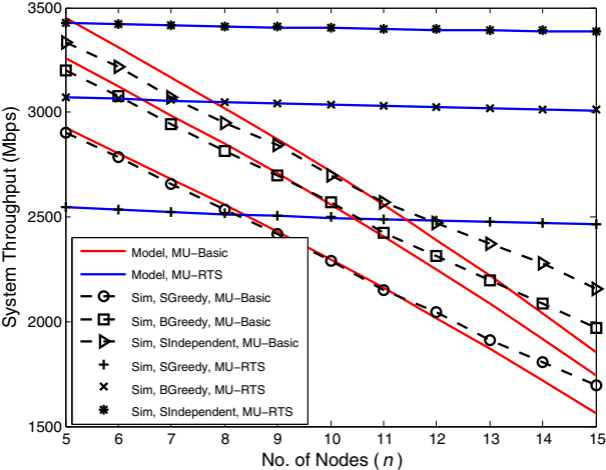

Supplement: MOESM9 [file 11898484]
